# Supplementary material for: Eco-friendly synthesis of silver nanoparticles as an unexplored application of photoredox catalysis
Source: Royal Society of Chemistry journal article supplement (doi:10.1039/d6na00170j), 2026-06-19
Supplement: d6na00170j1.pdf [file d6na00170j1.pdf]

*Supporting Information*

**Eco-Friendly Synthesis of Silver Nanoparticles as an  
Unexplored Application of Photoredox Catalysis**

Willber D. Castro-Godoy, Luciana C. Schmidt, Juan E. Argüello\* and  
Adrián A. Heredia\*

*Table of Contents*

|                                                                                           |     |
|-------------------------------------------------------------------------------------------|-----|
| <b>Table S1.</b> Study of stabilizers .....                                               | S3  |
| UV-vis spectra resulting from using different stabilizers .....                           | S3  |
| <b>Table S2.</b> Study of the amount of photocatalyst.....                                | S4  |
| <b>Table S3.</b> Study of tertiary amines as sacrificial electron donors .....            | S5  |
| <b>Table S4.</b> Study of the concentration of the stabilizer.....                        | S6  |
| THERMODYNAMIC STUDIES .....                                                               | S9  |
| <b>Table S5.</b> Comparative analysis of AgNPs photocatalytic systems .....               | S12 |
| <sup>1</sup> H and <sup>13</sup> C NMR spectra of synthesized anilines ( <b>2</b> ) ..... | S13 |
| REFERENCES.....                                                                           | S25 |



## UV-vis spectra resulting from using different organic dyes and irradiation sources

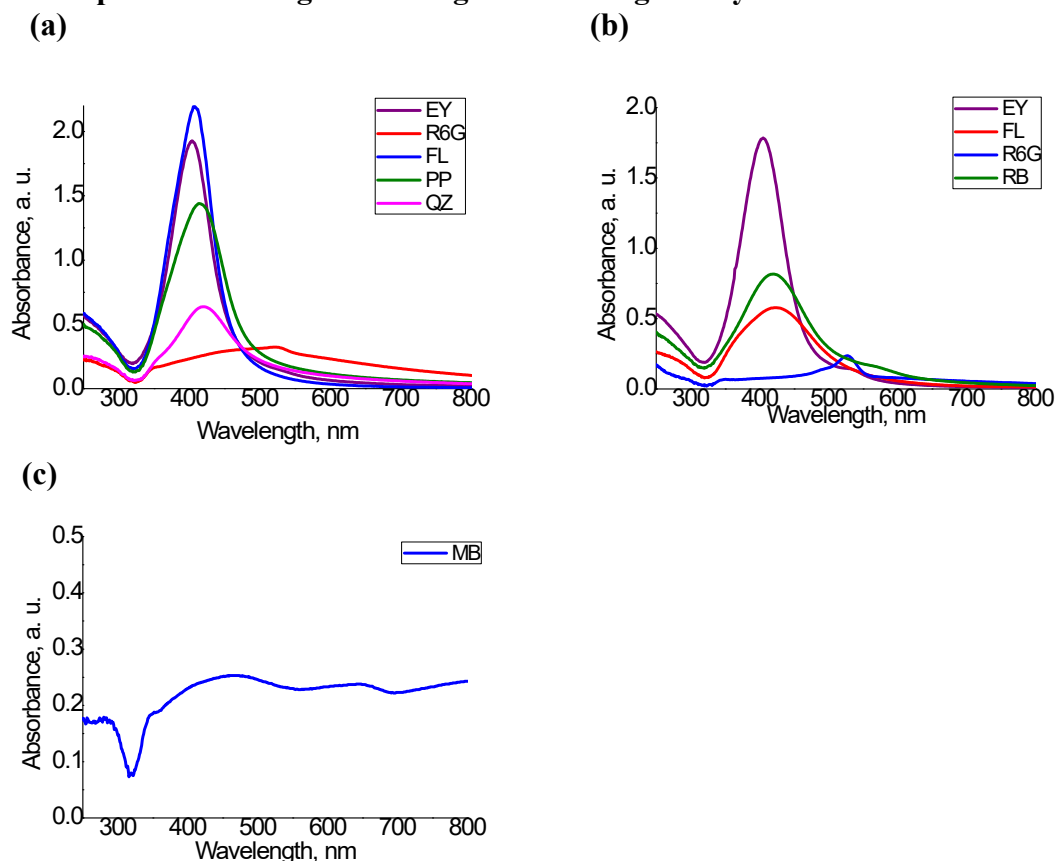

**Figure S2.** UV-vis spectra after irradiation with (a) a 3 W blue-LED (467 nm); (b) a 3 W green-LED (522 nm) and (c) a 3 W red-LED (625 nm).

**Table S2.** Study of the amount of photocatalyst

| entry | EY (mol%) | plasmon resonance (UV-vis spectra) |           |
|-------|-----------|------------------------------------|-----------|
|       |           | $\lambda_{\max}$ (nm)              | FWHM (nm) |
| 1     | 0.1       | 413                                | 110       |
| 2     | 0.5       | 406                                | 95        |
| 3     | 1         | 404                                | 74        |
| 4     | 2         | 401                                | 81        |
| 5     | 5         | 398                                | 77        |

**Reaction condition:** AgNO<sub>3</sub> (0.05 mmol, 25 mM), TEA (3 equiv.), EY (indicated in the table) in 2 mL of an aqueous solution with PVP 40kDa (1% w/v), under nitrogen atmosphere, irradiated with a 3W green LED for 1 h. Spectra obtained from a 1:16 dilution.

### UV-vis spectra resulting from using different amounts of EY

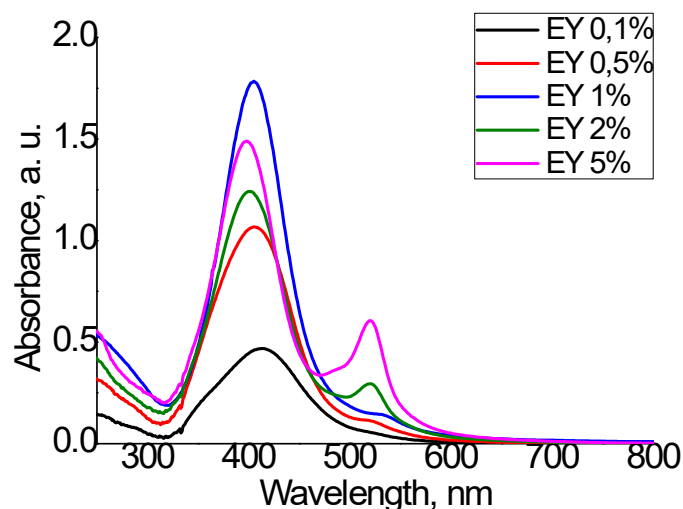

**Figure S3.** UV-vis spectra of the reaction mixture after irradiation using different amounts of EY.

**Table S3.** Study of tertiary amines as sacrificial electron donors

| entry | amine | plasmon resonance (UV-vis spectra) |           |
|-------|-------|------------------------------------|-----------|
|       |       | $\lambda_{\max}$ (nm)              | FWHM (nm) |
| 1     | TEA   | 405                                | 79        |
| 2     | TEOA  | 403                                | 86        |
| 3     | DIPEA | 407                                | 83        |
| 4     | TMEDA | 415                                | 103       |
| 5     | EDTA  | ND                                 |           |

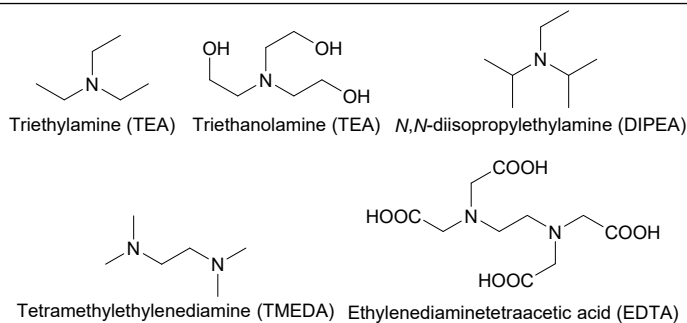

**Reaction condition:**  $\text{AgNO}_3$  (0.05 mmol, 25 mM), amine (3 equiv.), EY (1 mol%,  $5 \times 10^{-4}$  mmol) in 2 mL of an aqueous solution with PVP 40 kDa (1% w/v), under nitrogen atmosphere, irradiated with a 3W green LED for 1 h. Spectra obtained from a 1:16 dilution. ND: plasmon resonance not detected.

### UV-vis spectra resulting from different tertiary amines as sacrificial electron donors

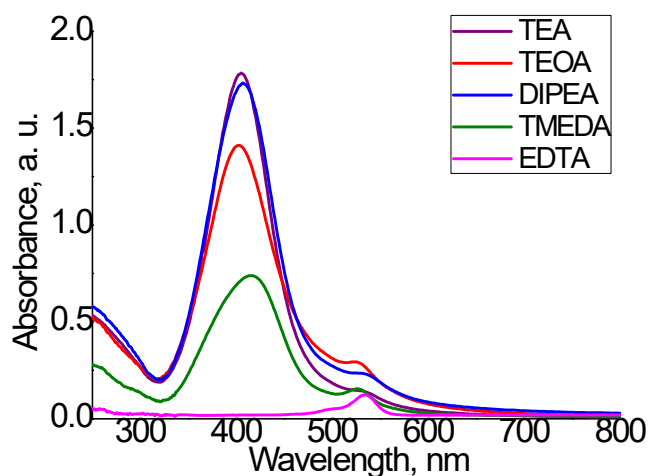

**Figure S4.** UV-vis spectra of the reaction mixture after irradiation using different tertiary amines as sacrificial electron donors.

**Table S4.** Study of the concentration of the stabilizer

| entry | PVP (%w/v) | plasmon resonance (UV-vis spectra) |           |
|-------|------------|------------------------------------|-----------|
|       |            | $\lambda_{\max}$ (nm)              | FWHM (nm) |
| 1     | 0.1        | 410                                | 95        |
| 2     | 0.5        | 407                                | 77        |
| 3     | 1          | 405                                | 76        |
| 4     | 2          | 405                                | 71        |
| 5     | 5          | 407                                | 78        |

**Reaction condition:** AgNO<sub>3</sub> (0.05 mmol, 25 mM), TEA (3 equiv.), EY (1 mol%) in 2 mL of an aqueous solution with 40 kDa PVP (concentration indicated in table), under nitrogen atmosphere, irradiated with a 3 W green LED for 1 h. Spectra obtained from a 1:16 dilution.

## UV-vis spectra resulting from using different amounts of PVP 40 kDa

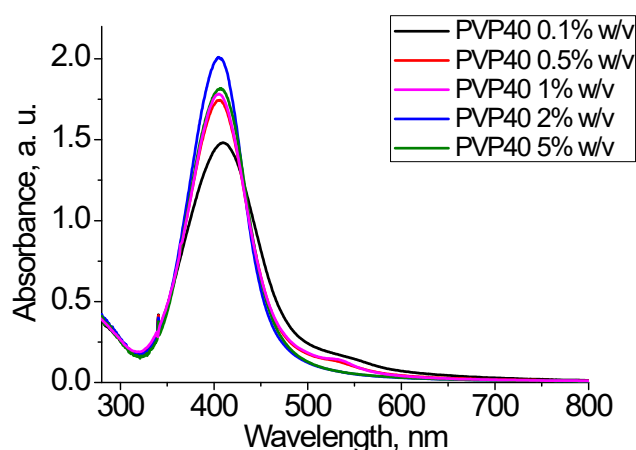

**Figure S5.** (a) UV-vis spectra of the reaction mixture after irradiation using different amounts of PVP 40 kDa.

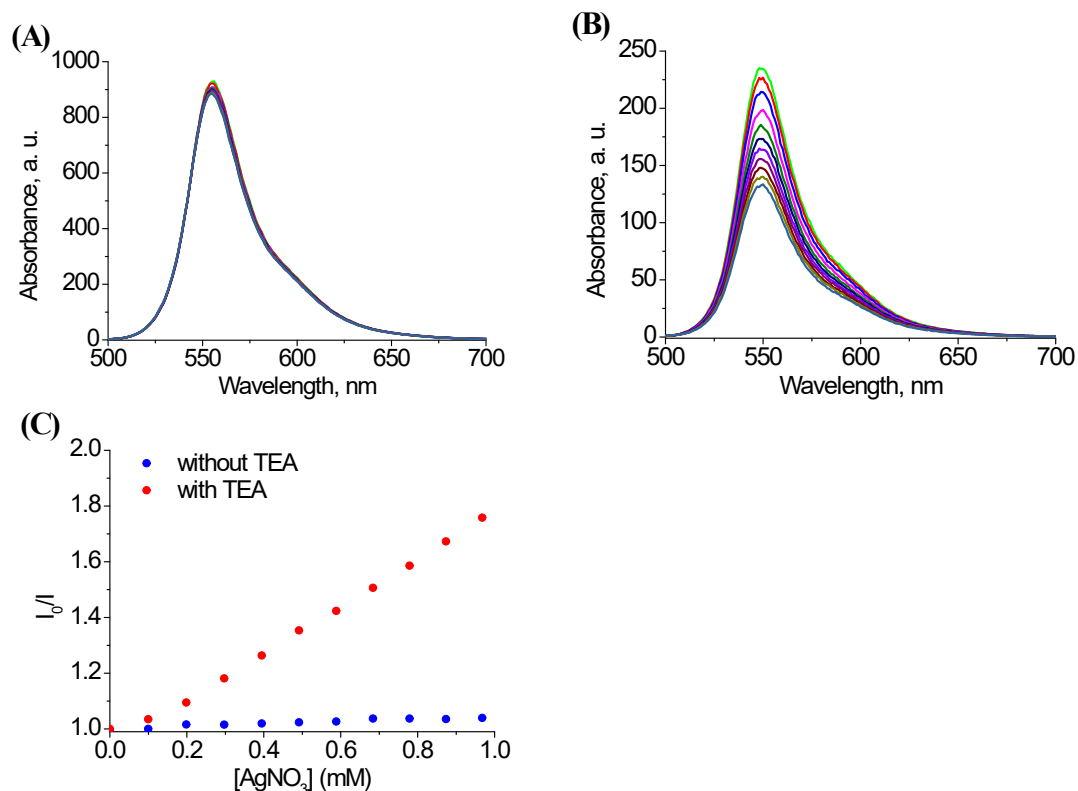

**Figure S6.** Fluorescence quenching experiments. (A) Steady-state fluorescence (λ<sub>exc</sub> = 460 nm) of EY (1 × 10<sup>-2</sup> mM) in PVP 2% w/v upon addition of AgNO<sub>3</sub> (up to 1 mM). (B) Steady-state fluorescence (λ<sub>exc</sub> = 460 nm) of EY (1 × 10<sup>-2</sup> mM) in PVP 2% w/v in the presence of TEA (3 mM) upon addition of AgNO<sub>3</sub> (up to 1 mM). (C) Fluorescence quenching Stern-Volmer plot (K<sub>SV</sub><sup>woTEA</sup> = 0.047 mM<sup>-1</sup>; K<sub>SV</sub><sup>wTEA</sup> = 0.810 mM<sup>-1</sup>).

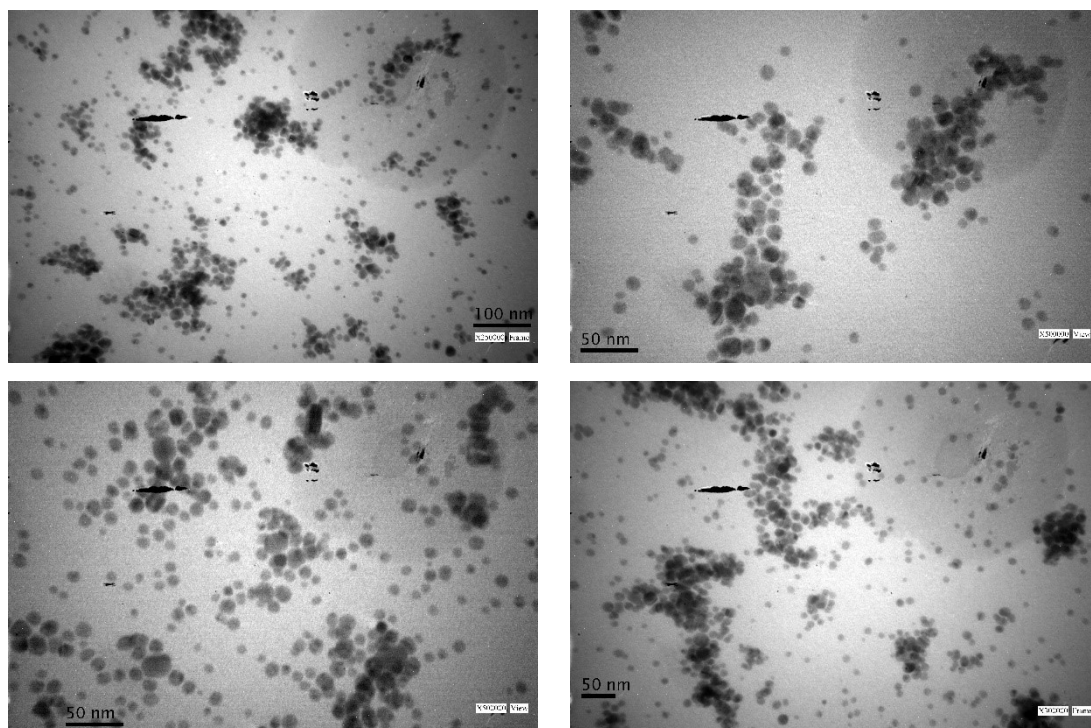

**Figure S7.** TEM images of the synthesized AgNPs under the optimized conditions.

### IRRADIATION SETUP

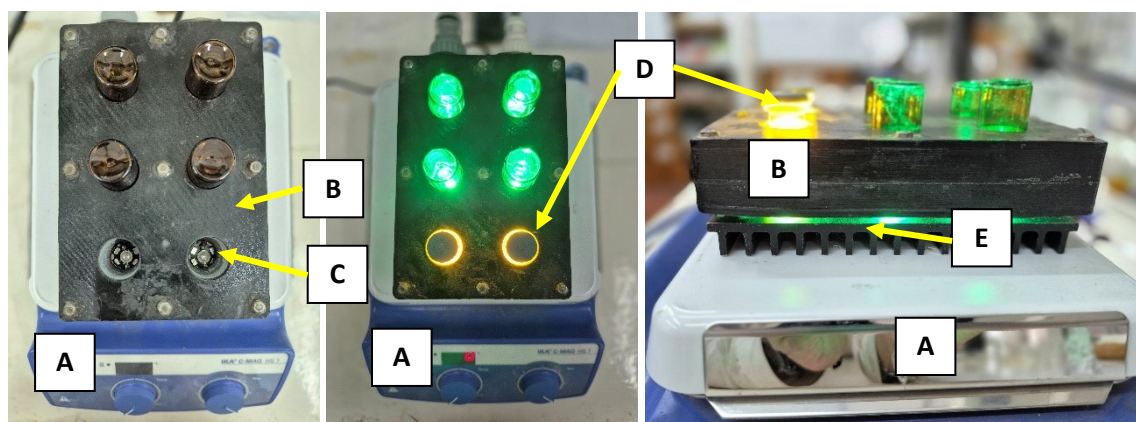

**Figure S8.** Homemade photoreactor: **A:** Magnetic stirrer. **B:** Cooling rack connected to a temperature controlled recirculatory (25 °C). **C:** 3W green LED (522 nm). **D:** Glass reaction vial. **E:** Aluminum heatsink supporting six 3W green LED lights on it.

## THERMODYNAMIC STUDIES

Possible mechanistic scenarios are shown in Scheme S1. To assess the exergonicity of each step and cycle, thermodynamic calculations were developed.

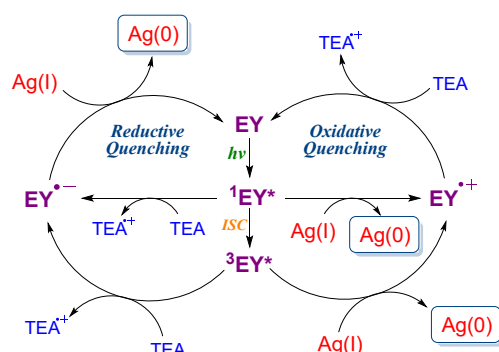

**Scheme S1.** Reduction photocatalyzed of Ag(I) to Ag(0). Both reductive and oxidative quenching are showed.

Gibbs free energy equation for photoinduced processes (Rehm-Weller equation):<sup>1</sup>

$$\Delta G = - [E(A) - E(D)] - E_{excited\ state} + \Delta E_{coul}$$

Gibbs free energy equation for thermal redox processes:

$$\Delta G = - n F [E(A) - E(D)]$$

where  $n = 1 \text{ mol } e^-$  in all cases and  $F = 96485 \text{ J V}^{-1} \text{ mol}^{-1}$

Redox potential:

$$\begin{aligned} E(\text{EY} / \text{EY}^{\bullet-}) &= -1.06 \text{ V vs SCE}^2 \\ E(\text{EY}^{\bullet+} / \text{EY}) &= +0.72 \text{ V vs SCE}^2 \\ E(\text{Ag(I)} / \text{Ag(0)}) &= +0.552 \text{ V vs SCE}^3 \\ E(\text{TEA}^{\bullet+} / \text{TEA}) &= +0.96 \text{ V vs SCE}^4 \end{aligned}$$

Excited state energies

$$E_S(\text{EY}) = +2.31 \text{ eV}^5$$

$$E_T(\text{EY}) = +1.91 \text{ eV}^5$$

Coulombic term

is relatively small for polar solvents, ca. 0.06 eV in  $\text{CH}_3\text{CN}$ , and is therefore neglected.

All potentials are expressed in volts and energies converted to eV where appropriate.

### Reductive quenching

✚ Oxidation of TEA from the singlet EY

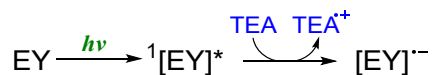

$$\Delta G = -[-1.06 - 0.96] - 2.31 \text{ eV} = -0.29 \text{ eV} = -6.69 \text{ kcal mol}^{-1}$$

☛ Oxidation of TEA from the triplet EY

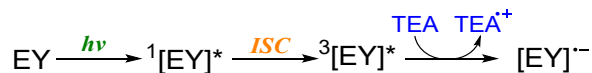

$$\Delta G = -[-1.06 - 0.96] - 1.91 \text{ eV} = +0.11 \text{ eV} = +2.54 \text{ kcal mol}^{-1}$$

☛ Reduction of Ag(I) from the EY<sup>·-</sup>

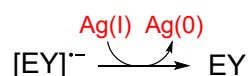

$$\Delta G = -nF(0.552 \text{ V} - (-1.06 \text{ V})) = -155.53 \text{ kJ mol}^{-1} = -37.17 \text{ kcal mol}^{-1}$$

### Oxidative quenching

☛ Reduction of Ag(I) from singlet EY

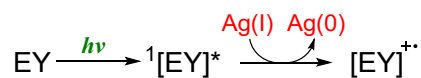

$$\Delta G = -[0.552 \text{ V} - 0.72 \text{ V}] - 2.31 \text{ eV} = -2.142 \text{ eV} = -49.39 \text{ kcal mol}^{-1}$$

☛ Reduction of Ag(I) from triplet EY

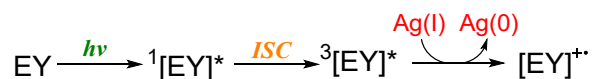

$$\Delta G = -[0.552 \text{ V} - 0.72 \text{ V}] - 1.91 \text{ eV} = -1.742 \text{ eV} = -40.17 \text{ kcal mol}^{-1}$$

☛ Oxidation of TEA from EY<sup>·+</sup>

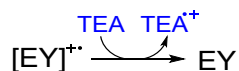

$$\Delta G = -nF(0.72 \text{ V} - 0.96 \text{ V}) = +23.16 \text{ kJ mol}^{-1} = +5.53 \text{ kcal mol}^{-1}$$

## MECHANISM OF REDUCTION OF NITROARENES CATALYZED BY AgNPs<sup>6</sup>

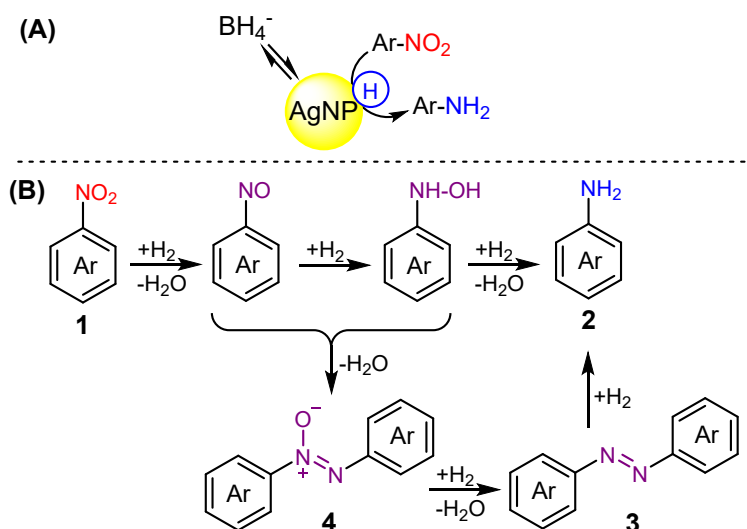

**Scheme S2.** (A) Catalytic activation of  $H_2$  generated from  $BH_4^-$  ions and adsorption and reduction of nitroarenes on the AgNP surface. (B) Proposed mechanism for the catalytic reduction of nitroarenes with activated hydrogen by AgNPs.

## UV-vis spectra of photogenerated AgNPs before and after the reduction of nitrobenzene

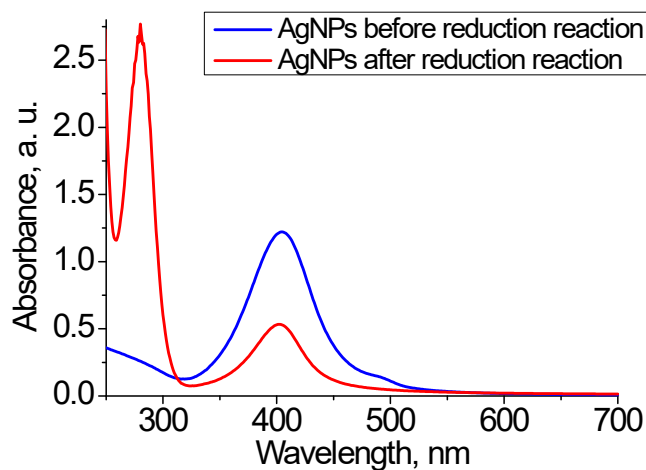

**Figure S9.** UV-vis spectra of AgNPs before and after the catalytic reduction of nitrobenzene.

**Table S5. Comparative analysis of AgNPs photocatalytic systems**

| Entry            | photoactive molecule                                        | light source ( $\lambda_{em}$ )         | reaction time | solvent         | stabilizing/capping agent      | shape (size)                          | application                     | reference                                                                 |
|------------------|-------------------------------------------------------------|-----------------------------------------|---------------|-----------------|--------------------------------|---------------------------------------|---------------------------------|---------------------------------------------------------------------------|
| 1                | thionine                                                    | 250 W xenon lamp (530 nm cutoff filter) | 1.5 h         | Ethanol/toluene | thionine                       | Spherical (up to 20 nm)               | -                               | <i>Chem. Mater.</i> <b>2005</b> , <i>17</i> , 5404-5410                   |
| 2                | thioxantones                                                | laser diode (377 nm)                    | 15 min        | acetonitrile    | thioxantone                    | Spherical (4.8 nm)                    | -                               | <i>J. Phys. Chem. C</i> <b>2010</b> , <i>114</i> , 10396–10402            |
| 3                | benzophenone derivatives                                    | 35 W blue LED (419 nm)                  | 25 seg        | methanol        | benzophenone derivatives       | Spherical (up to 24 nm)               | -                               | <i>ACS Omega</i> <b>2023</b> , <i>8</i> , 3207–3220                       |
| 4                | riboflavin                                                  | HPLN 125 W (405-435 nm)                 | 6 h           | water           | riboflavin                     | spherical and polydisperse (57-73 nm) | antimicrobial activities        | <i>J. Mol. Struct.</i> <b>2023</b> , <i>1289</i> , 135863                 |
| 5                | <i>Matricaria chamomilla</i> L. herb extract                | sunlight                                | 5 min         | water           | plant extract                  | Spherical (about 26 nm)               | dye degradation                 | <i>Biomolecules</i> <b>2020</b> , <i>10</i> , 1604                        |
| 6                | <i>Withania somnifera</i> leaf powder                       | sunlight                                | 12 h          | water           | biomolecules from the pant     | Pseudo-spherical (5-30 nm)            | antimicrobial activities        | <i>J. Photochem. Photobiol. B: Biol.</i> <b>2014</b> , <i>132</i> , 45-55 |
| 7                | flavoproteins from <i>Pleurotus citrinopileatus</i> extract | sunlight                                | 3 h           | water           | biomolecules from the mushroom | Spherical (7 nm)                      | antibacterial activities        | <i>J. Photochem. Photobiol. B: Biol.</i> <b>2018</b> , <i>188</i> , 42-49 |
| 8                | <i>Saccharomyces cerevisiae</i> extract                     | White light                             | 24 h          | water           | biomolecules from extract      | Spherical (100 nm)                    | -                               | <i>Bioprocess Biosyst. Eng.</i> <b>2024</b> , <i>7</i> , 1669–1682        |
| <i>This work</i> | <i>eosin Y</i>                                              | <i>3 W green LED (522 nm)</i>           | <i>1 h</i>    | <i>water</i>    | <i>PVP 40 (2% w/v)</i>         | <i>Spherical (10-12 nm)</i>           | <i>reduction of nitroarenes</i> | -                                                                         |

**$^1\text{H}$  and  $^{13}\text{C}$  NMR spectra of synthesized anilines (2)**

**$^1\text{H}$  NMR. Aniline (2a)**

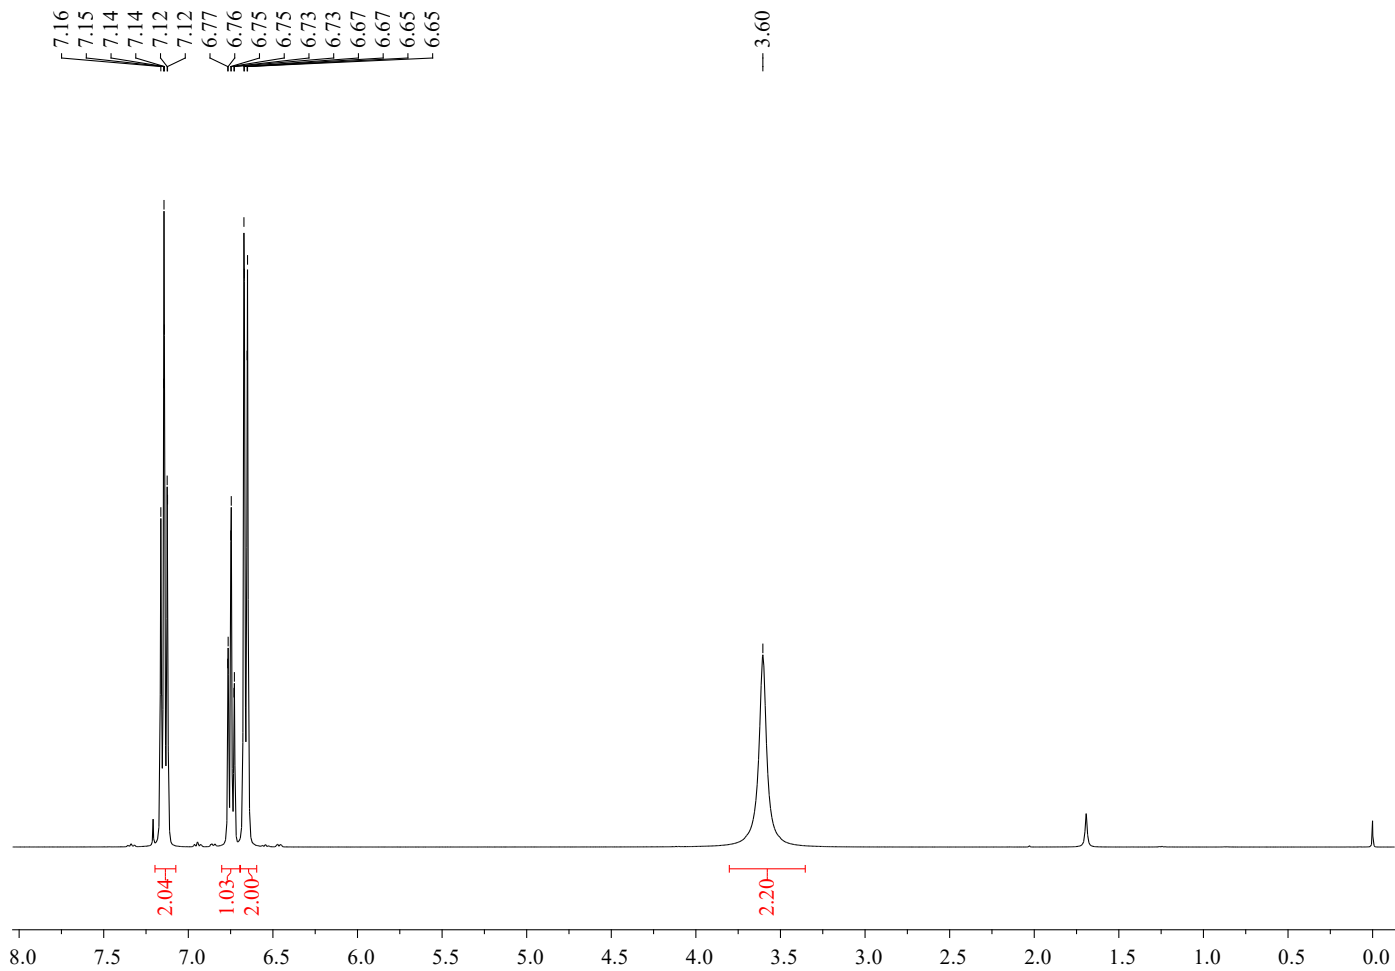

**$^{13}\text{C}$  NMR. Aniline (2a)**

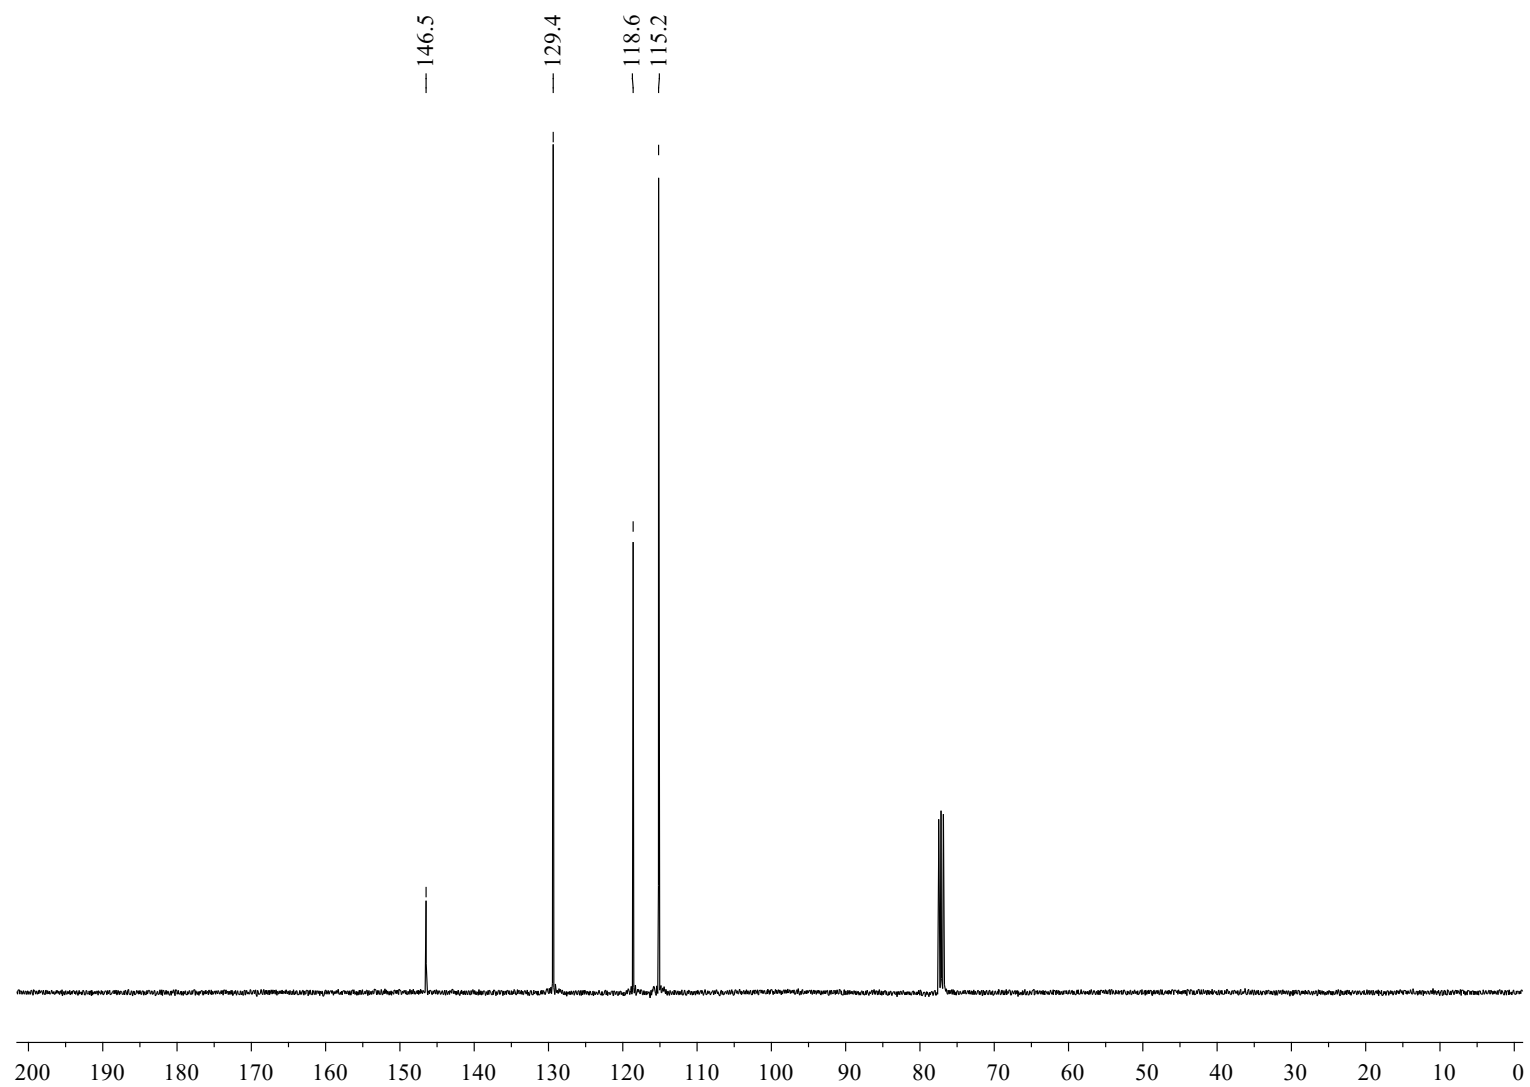

<sup>1</sup>H NMR. *p*-toluidine (2b)

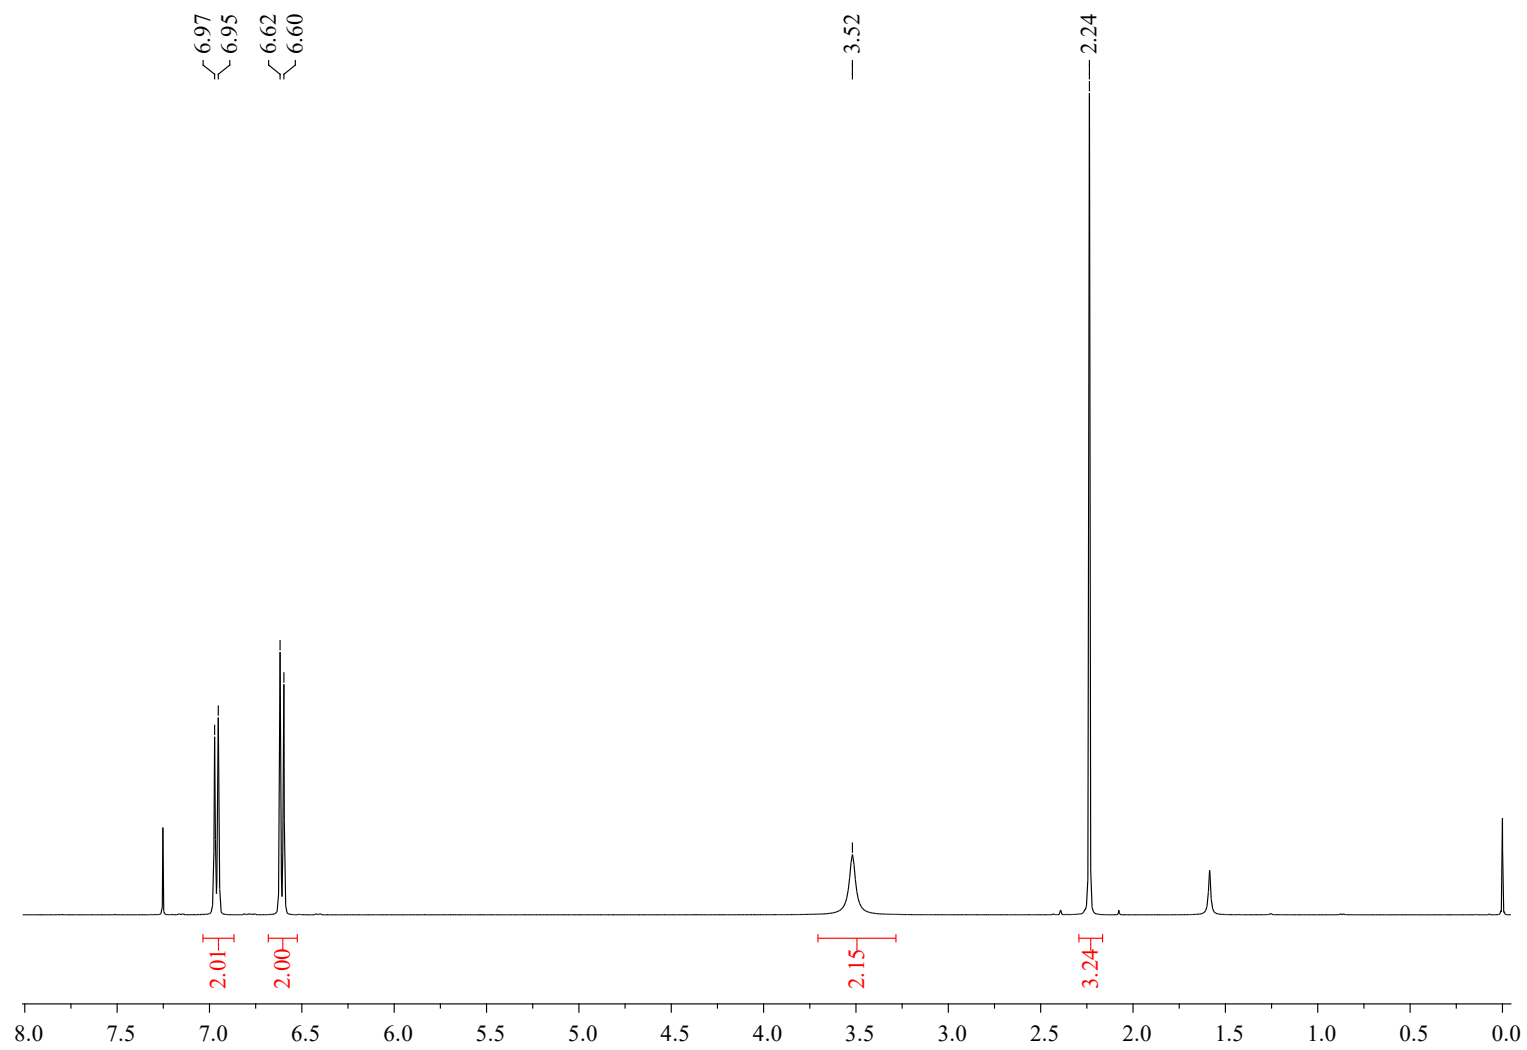

**<sup>13</sup>C NMR. *p*-toluidine (2b)**

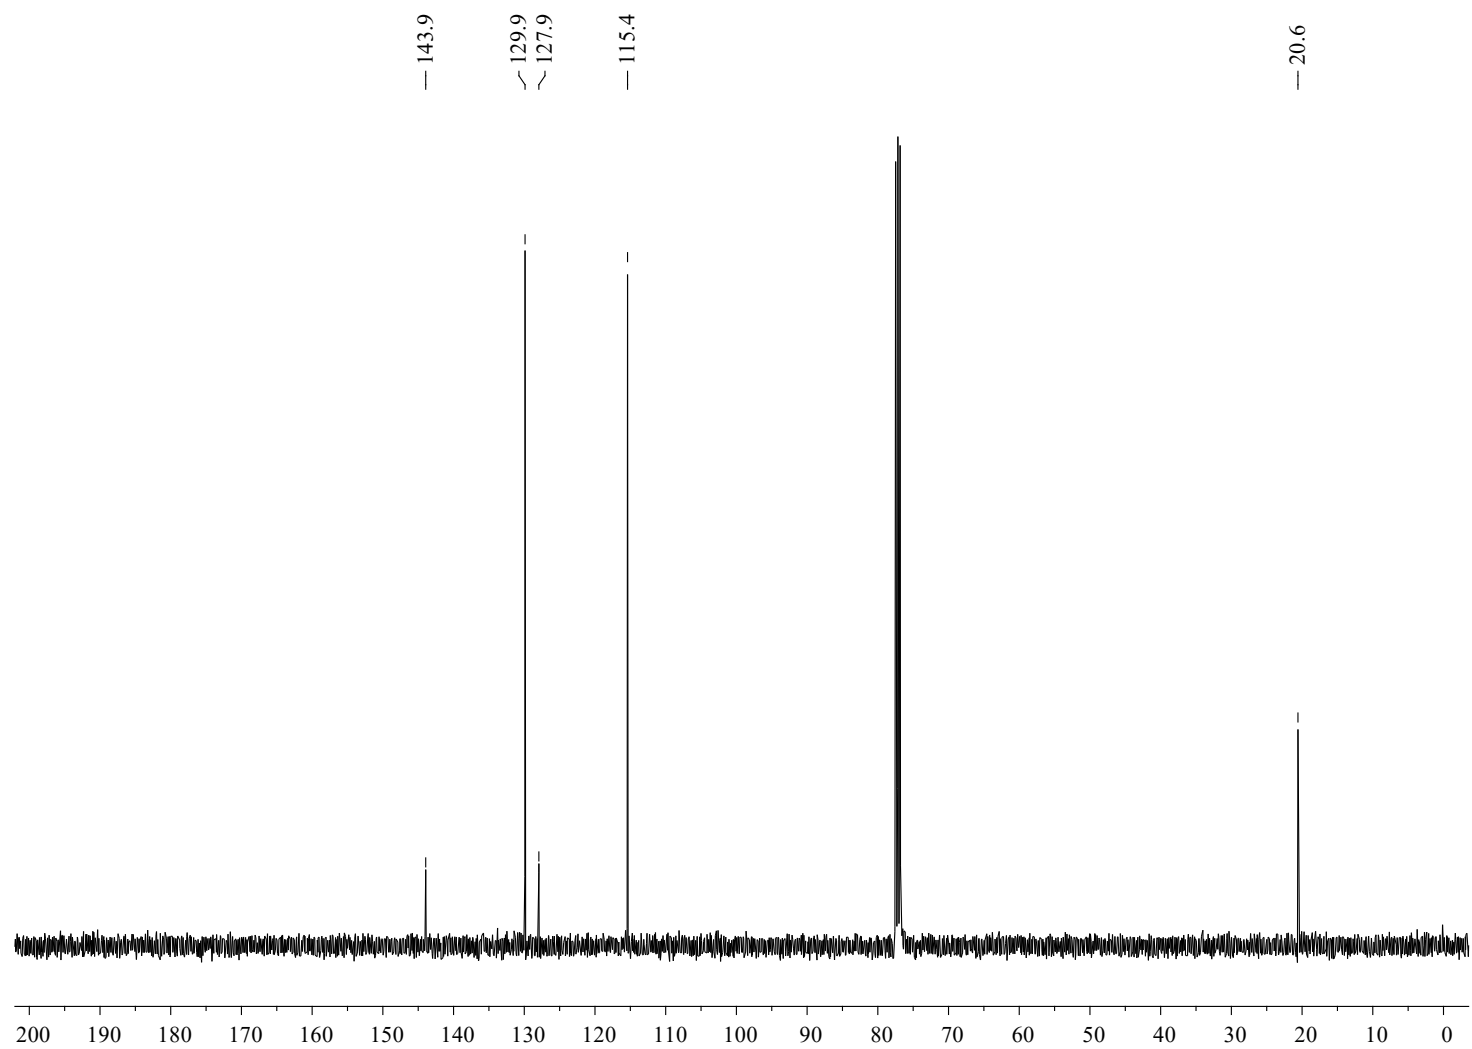

**<sup>1</sup>H NMR. 4-aminoacetanilide (2c)**

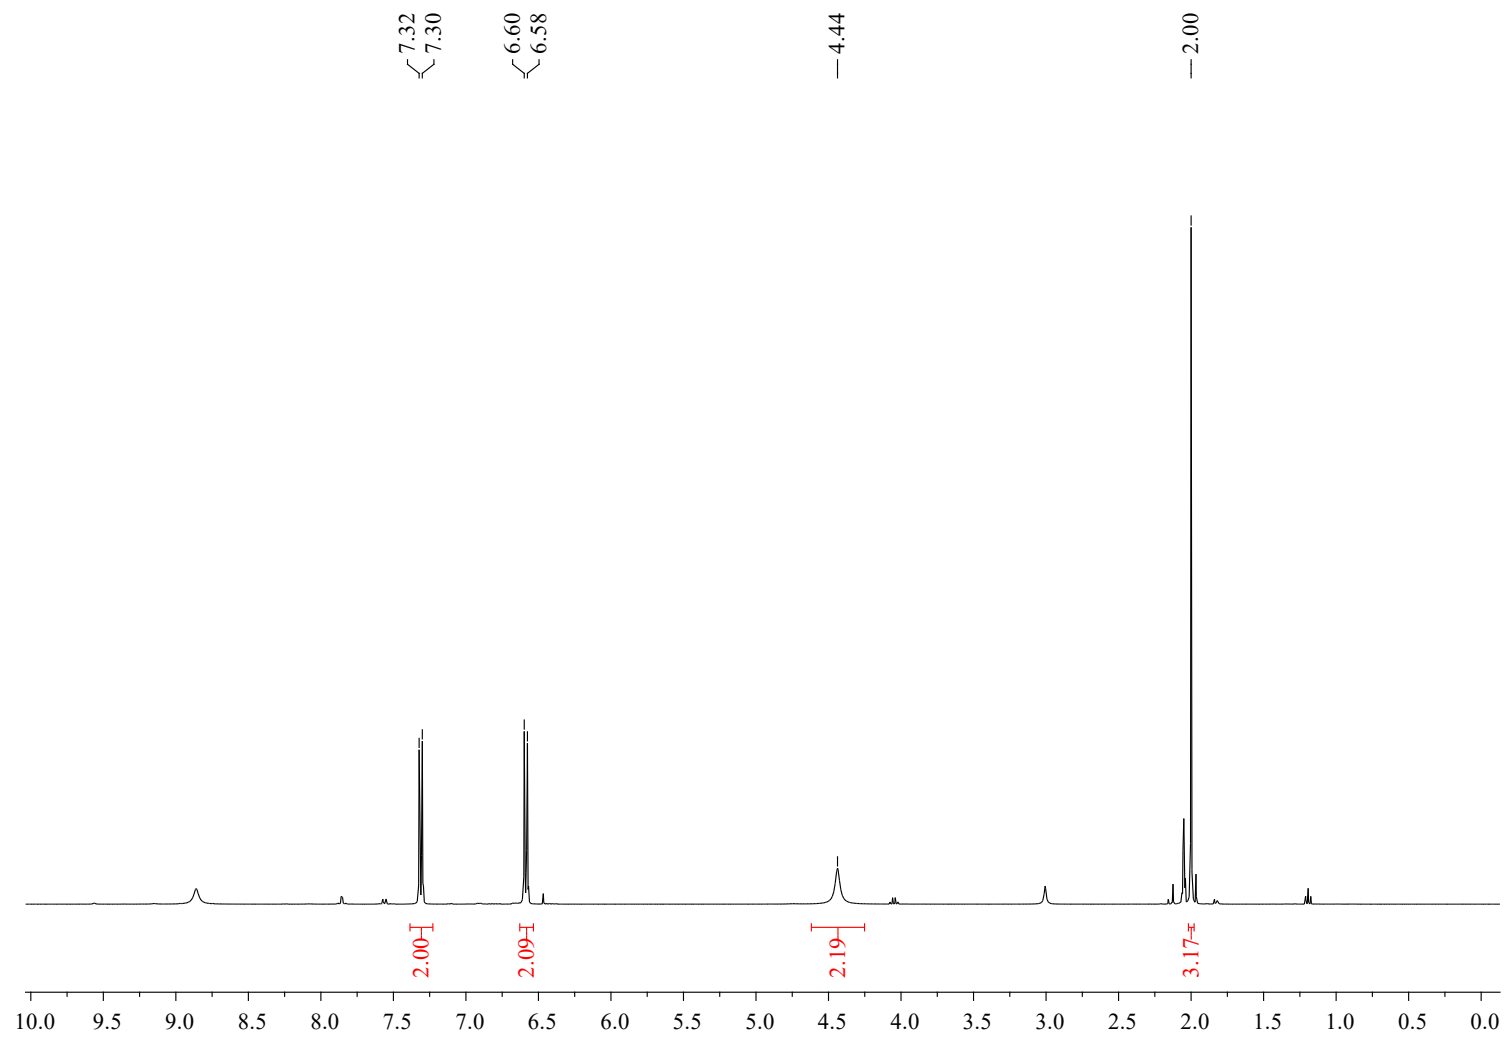

**<sup>13</sup>C NMR. 4-aminoacetanilide (2c)**

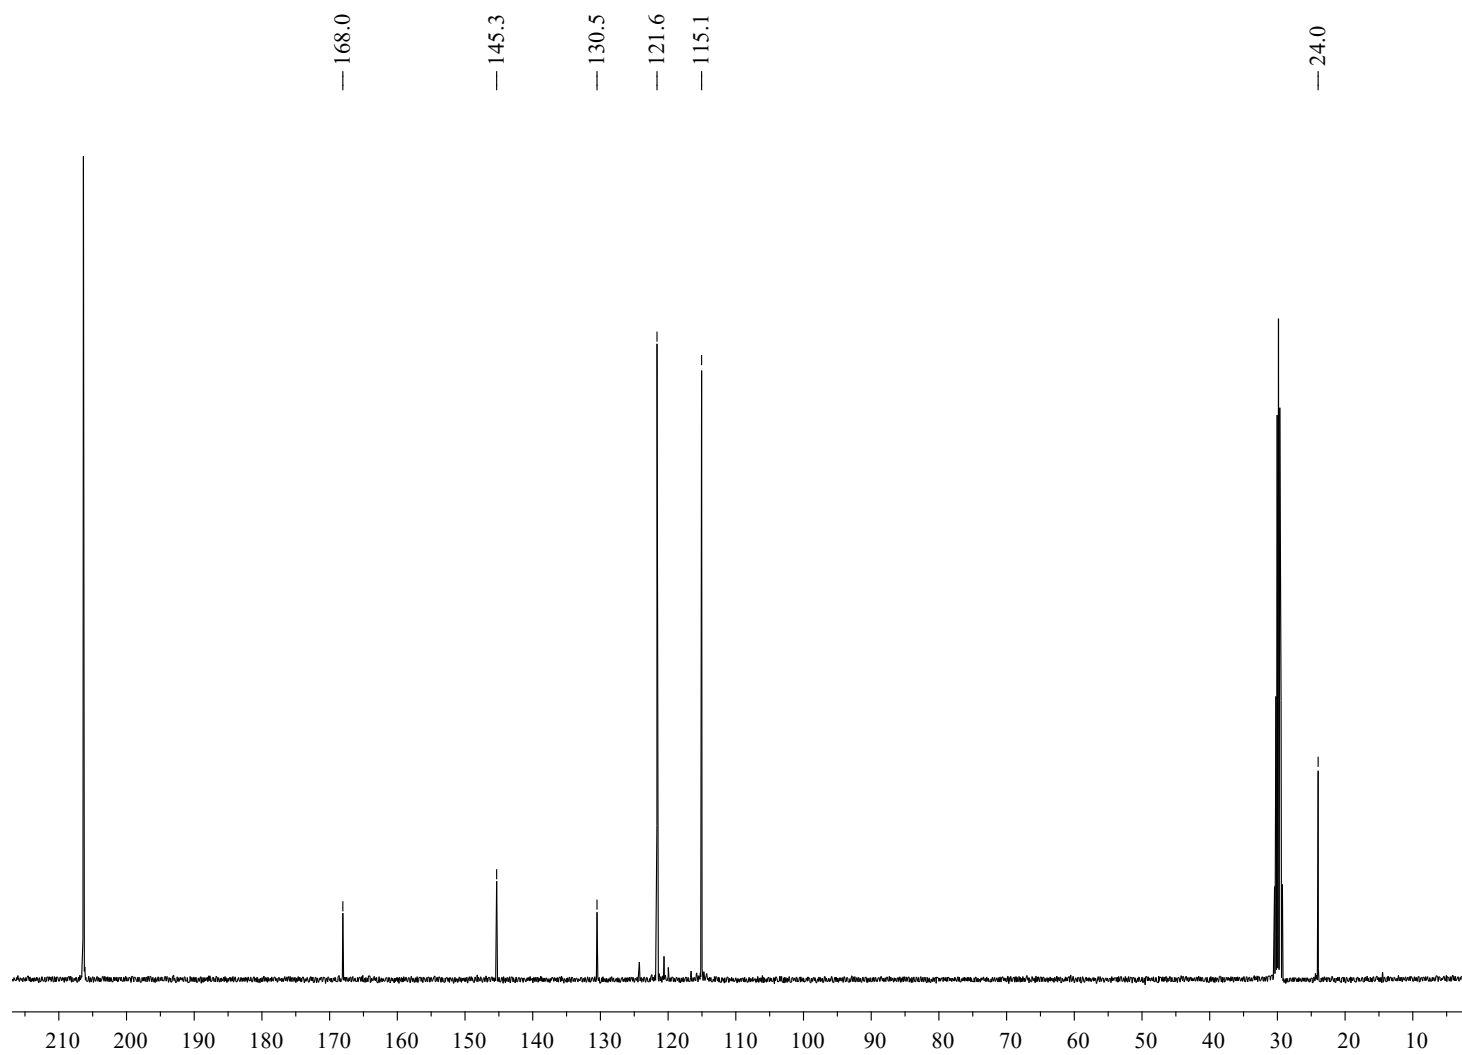

**<sup>1</sup>H NMR. 4-chloroaniline (2d)**

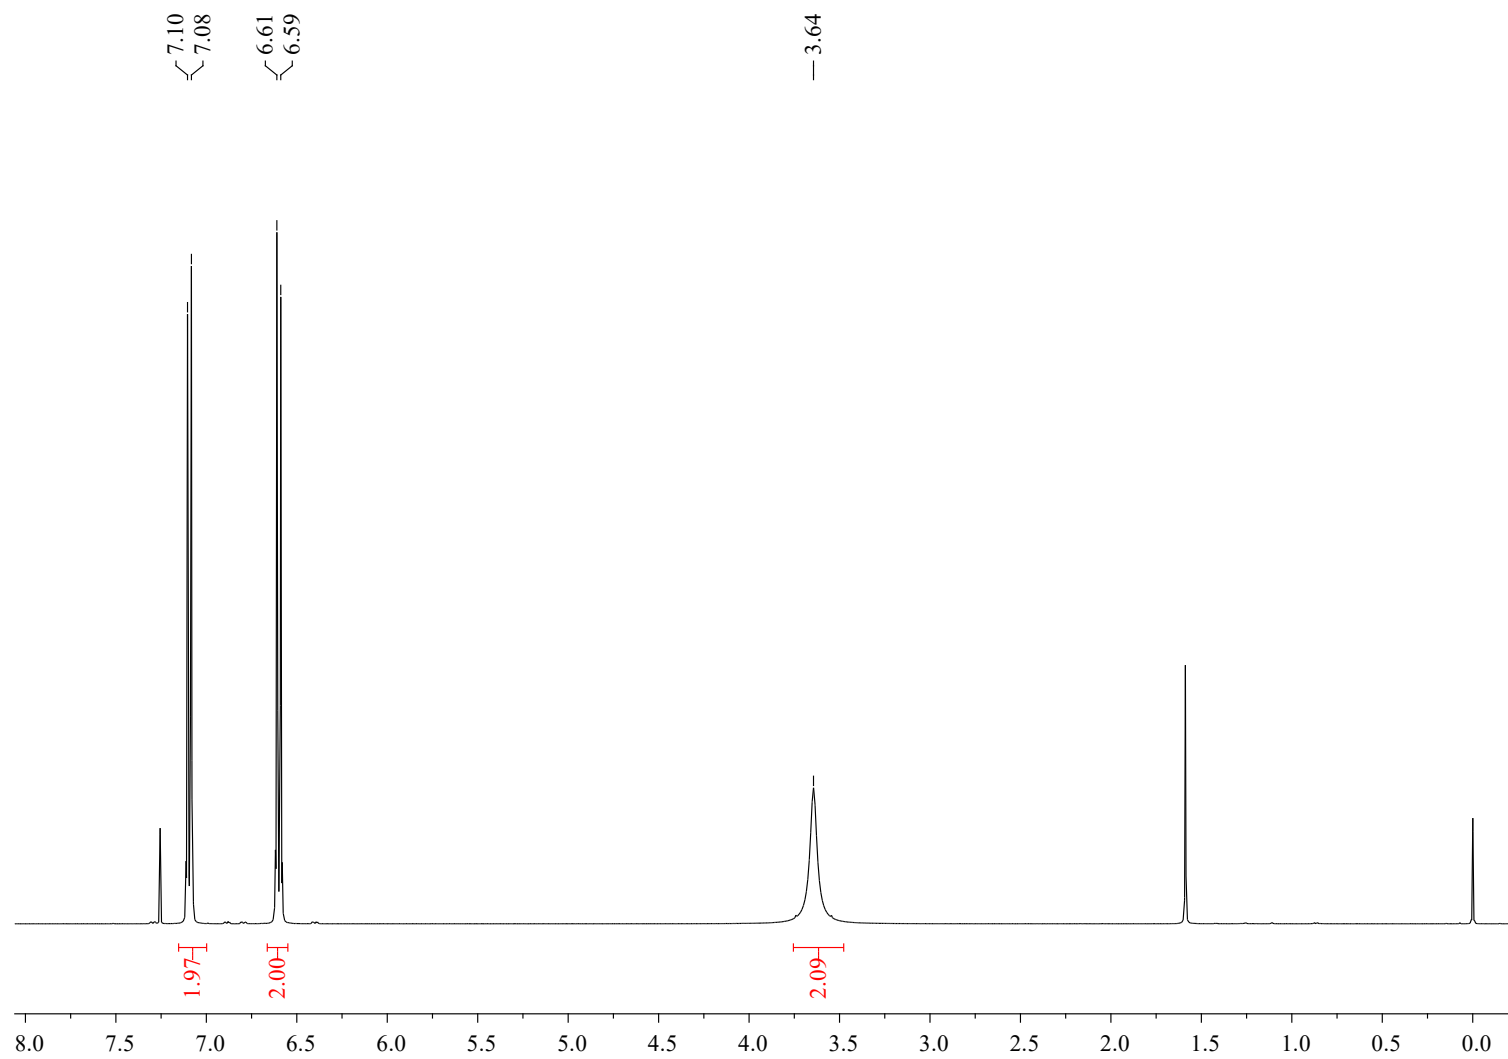

**$^{13}\text{C}$  NMR. 4-chloroaniline (2d)**

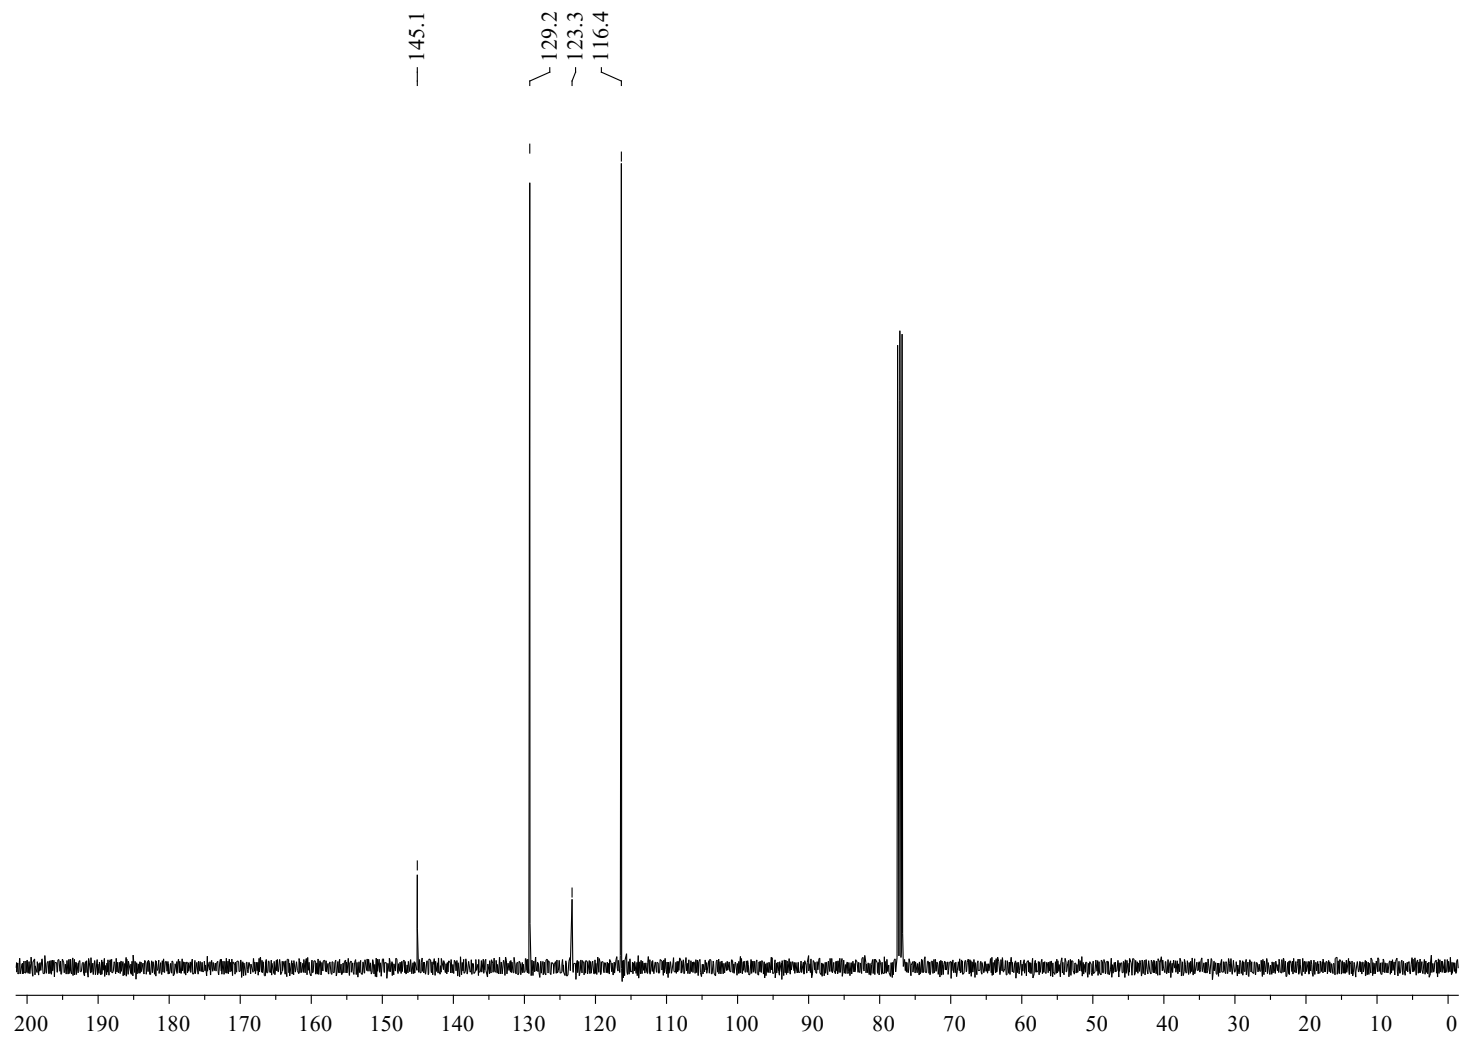

**<sup>1</sup>H NMR. 5-aminoquinoline (2e)**

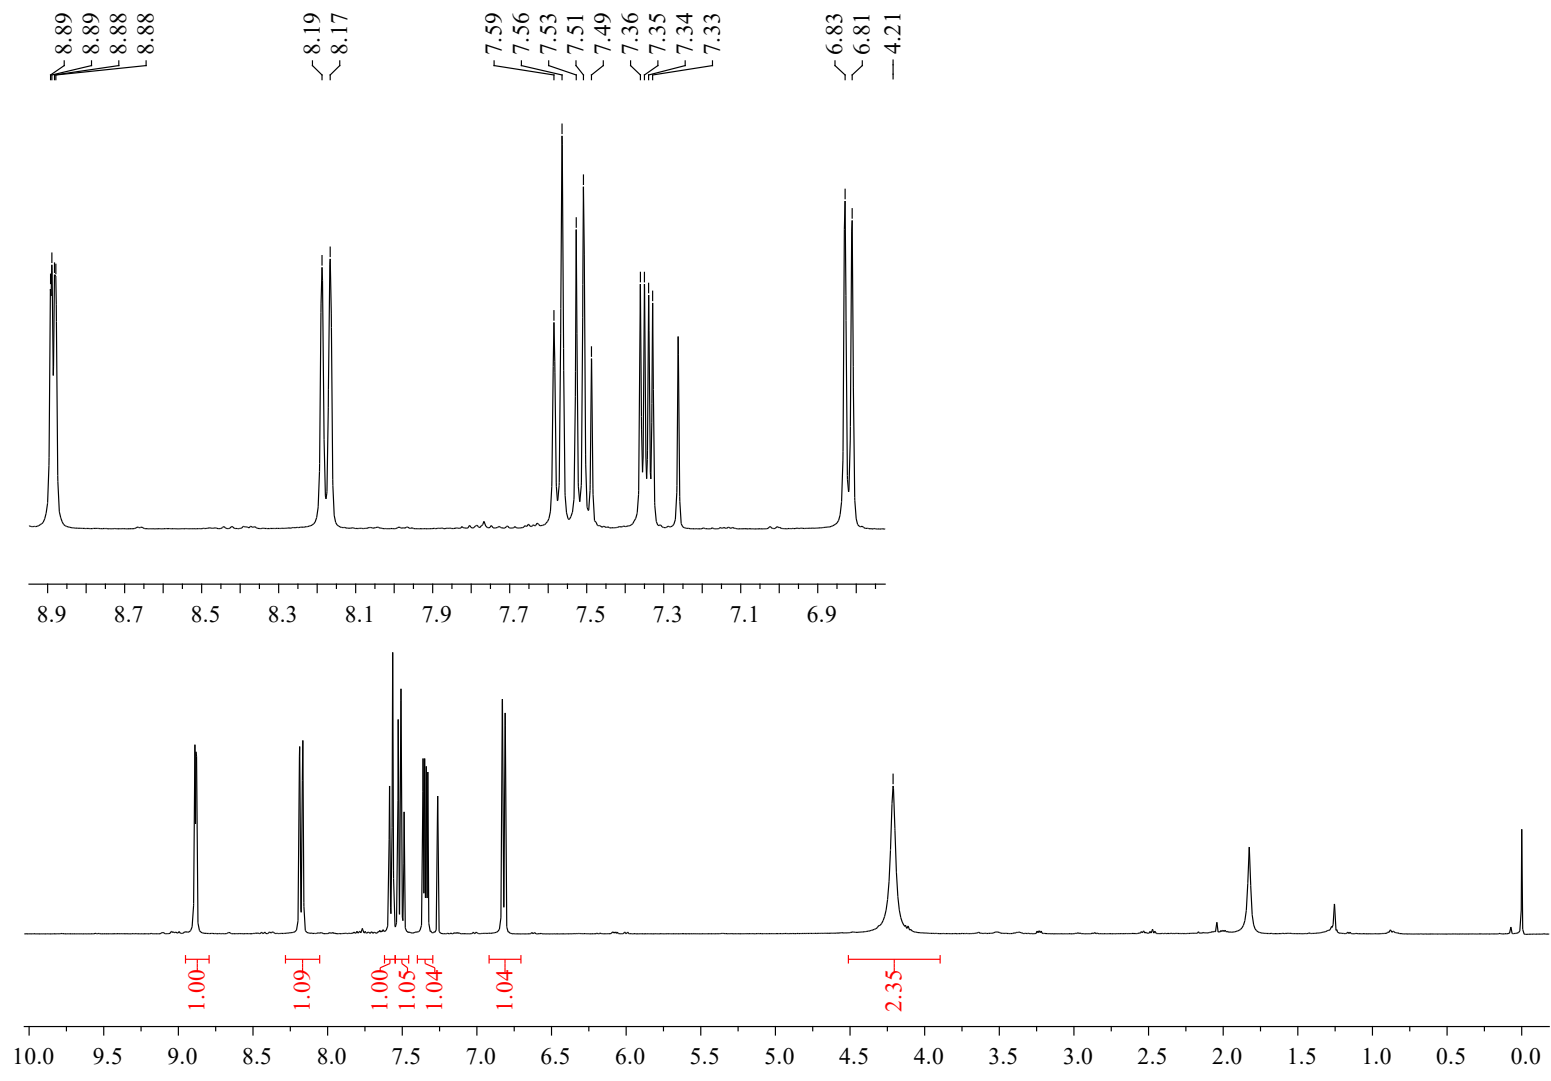

**<sup>13</sup>C NMR. 5-aminoquinoline (2e)**

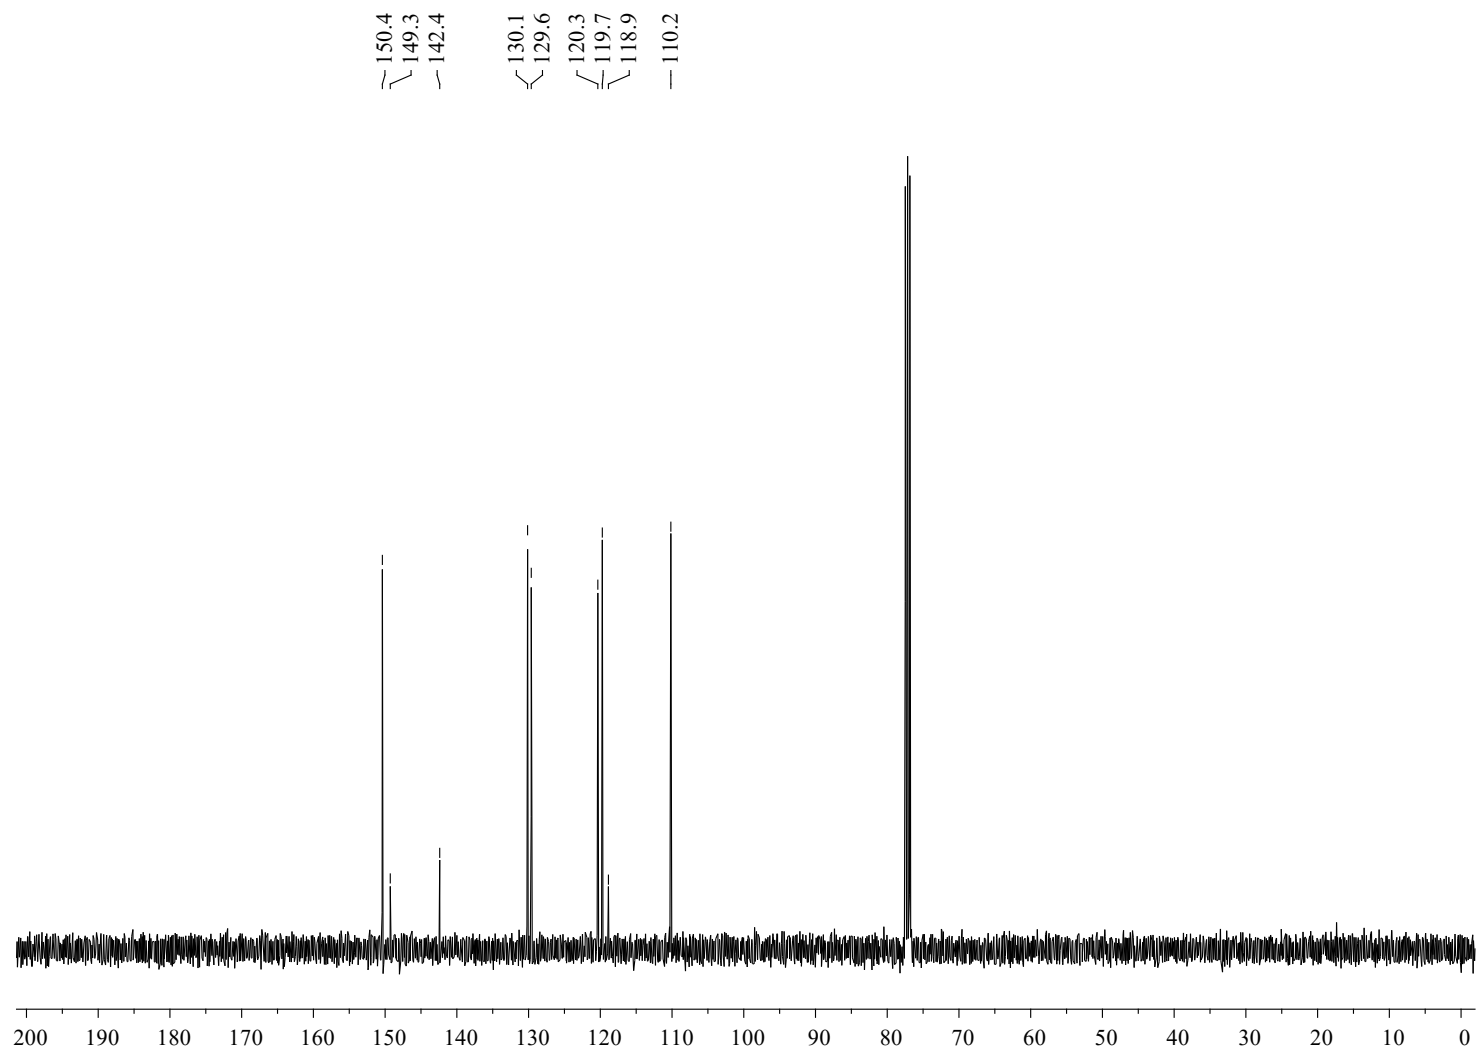

**<sup>1</sup>H NMR. 5-amino-1,2,3,4-tetrahydroquinoline (2e')**

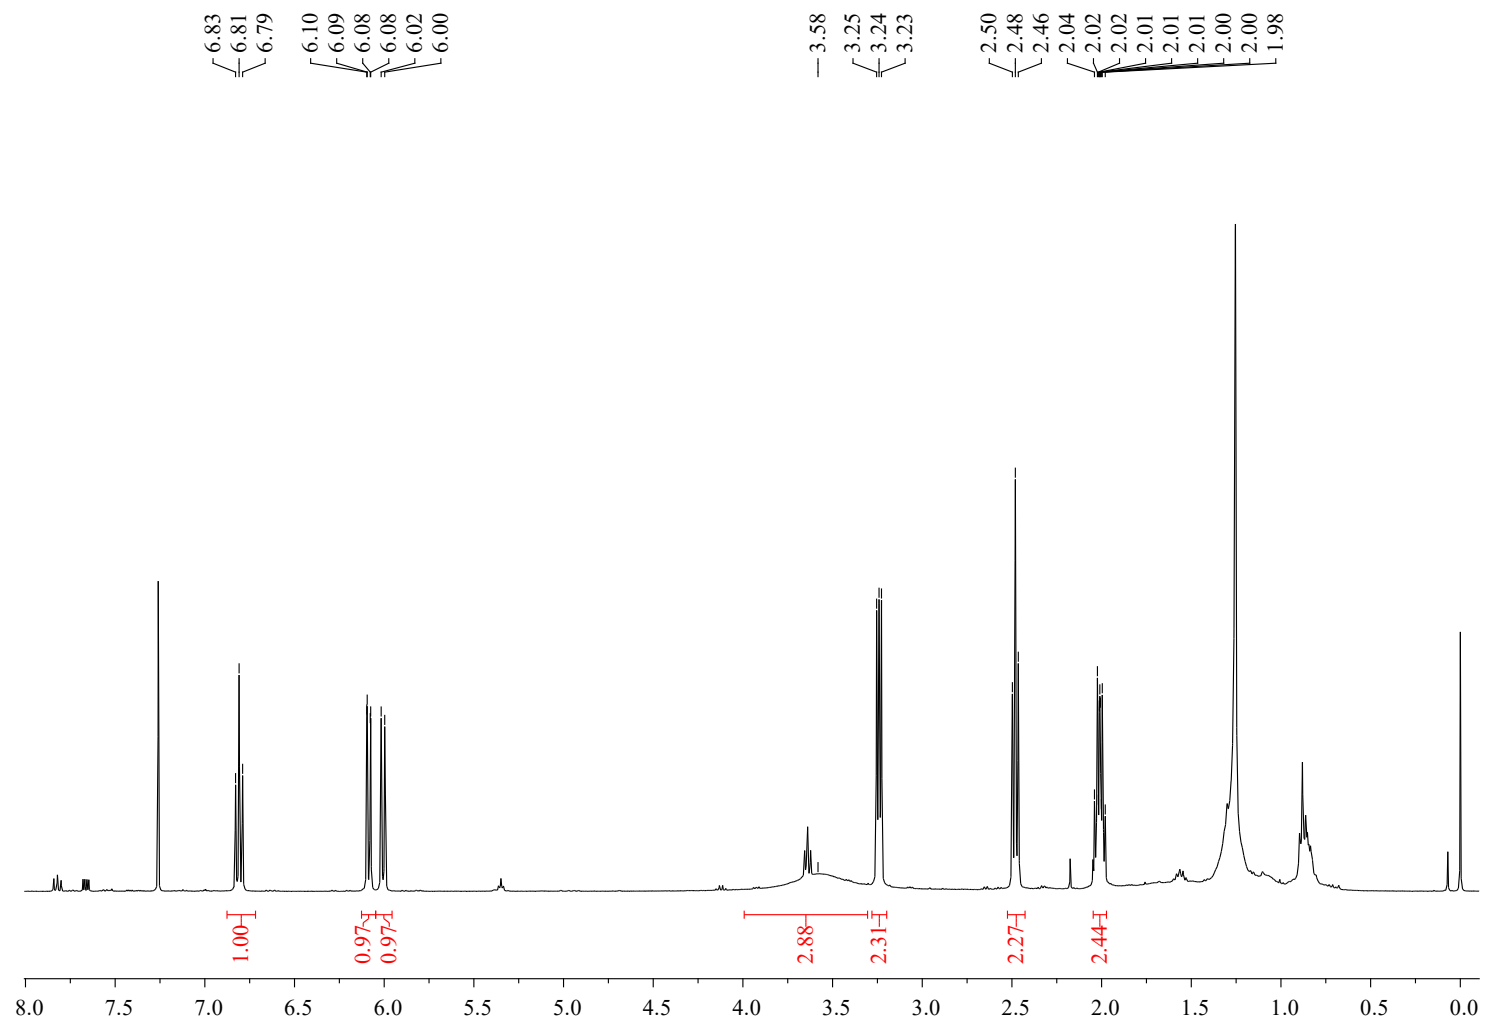

**<sup>13</sup>C NMR. 5-amino-1,2,3,4-tetrahydroquinoline (2e')**

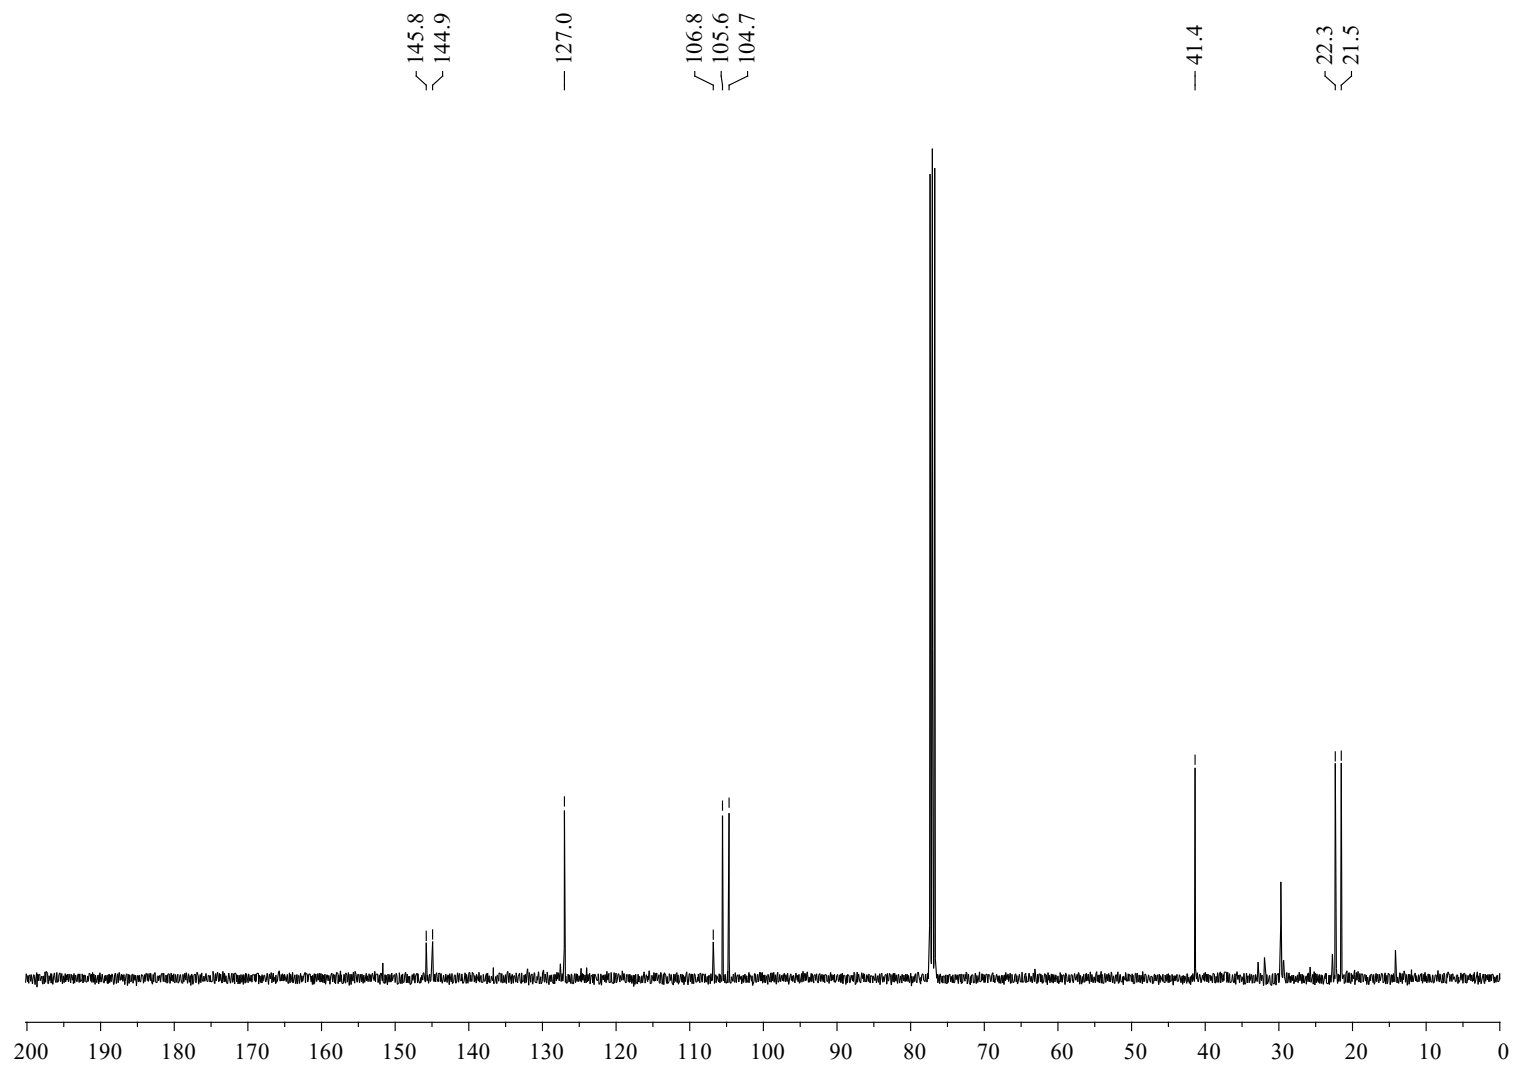

## REFERENCES

1. Rehm, D.; Weller, A. Kinetics of Fluorescence Quenching by Electron and H-Atom Transfer. *Isr. J. Chem.* **1970**, *8*, 259-271.
2. Hari, D. P.; Konig, B. Synthetic Applications of Eosin Y in Photoredox Catalysis. *Chem. Commun.* **2014**, *50*, 6688-6699.
3. Chang, R. *General Chemistry*, 10th Edition; McGraw-Hill: New York, **2010**.
4. Murov, S. L.; Carmichael, I.; Hug, G. L. *Handbook of Photochemistry, Second Edition*; CRC Press: Hawthorne, CA, U.S.A., **1993**.
5. Romero, N. A.; Nicewicz, D. A. Organic Photoredox Catalysis. *Chem. Rev.* **2016**, *116*, 10075-10166.
6. (a) Mahata, A.; Rai, R. K.; Choudhuri, I.; Singh, S. K.; Pathak, B. Direct vs. indirect pathway for nitrobenzene reduction reaction on a Ni catalyst surface: a density functional study. *Phys. Chem. Chem. Phys.* **2014**, *16*, 26365-26374. (b) Liang, L.-Y.; Kung, Y.-H.; Hsiao, V. K. S.; Chu, C.-C. Reduction of Nitroaromatics by Gold Nanoparticles on Porous Silicon Fabricated Using Metal-Assisted Chemical Etching. *Nanomaterials* **2023**, *13*, 1805.
